# Supplementary material
Source: PubMed Central journal article supplement (PMC3714337)

## Supplemental Data

**Figure S1. The blocking FXI antibody, 1A6, which inhibits the FXI activation by  $\alpha$ -FXIIa, does not inhibit the activation of FXI by thrombin.**

FXI activation was quantified in a purified system following addition of 5 nM  $\alpha$ -FXIIa (black bars) or 30 nM  $\alpha$ -thrombin (white bars) to 50 nM FXI in presence of vehicle or 50  $\mu$ g/ml 1A6. FXIa generation was measured with a chromogenic substrate. Data are mean  $\pm$  SE (n = 3).

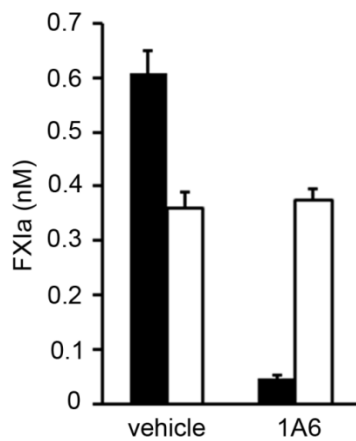

**Figure S2. Clotting time.** Long polyP was added to citrated plasma supplemented with 30 nM FVa in the presence of vehicle ( $\diamond$ ), 20  $\mu\text{g/ml}$  14E11 ( $\blacksquare$ ) or CTI plus 14E11 ( $\blacktriangle$ ). Clotting was initiated with 10 pM  $\alpha$ -thrombin. Data are mean  $\pm$  SE (n = 3)

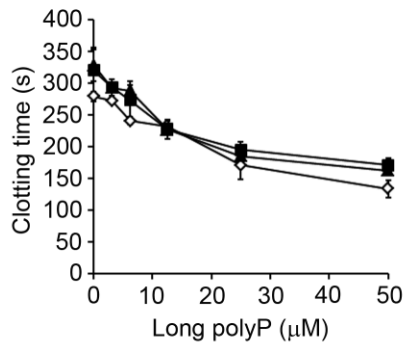

**Figure S3. Role of FXIIa in the activation of FIX, FX and prothrombin.** (A) FIX activation in a purified system following the addition of 100 nM FIX in the presence of 5 nM FXIa, 50 nM kallikrein or 50 nM FXIIa for 1 hour at 37 °C. FXIa generation was measured by western blot. (B) FX activation was measured in a purified system following the addition of 10 nM FXIa (○), FXIa plus 1A6 (20 μg/ml) (●), or 50 nM α-FXIIa (□) to 150 nM FX. FXa generation was measured with a chromogenic substrate. (C) Prothrombin activation was measured in a purified system following the addition of 50 nM FXa (○), 50 nM α-FXIIa (●) or 50 nM FXIa (□) to 1 μM prothrombin. Thrombin generation was measured with a chromogenic substrate. (D) Prothrombin activation was measured in a purified system following the addition of 10 nM FXIIa (●,○) or 10 nM kallikrein (■, □) to 1 μM prothrombin in the presence (●, ■) or absence of Ca<sup>2+</sup> (○, □). (E) FXIIa can activate prothrombin. The initial rates of prothrombin activation were quantified in a purified system following addition of 25 nM (●), 50 nM (▲), 100 nM (■) α-FXIIa, or 100 nM α-FXIIa plus CTI (◇). Thrombin generation was measured with a chromogenic substrate. Data are mean ± SE (n = 3).

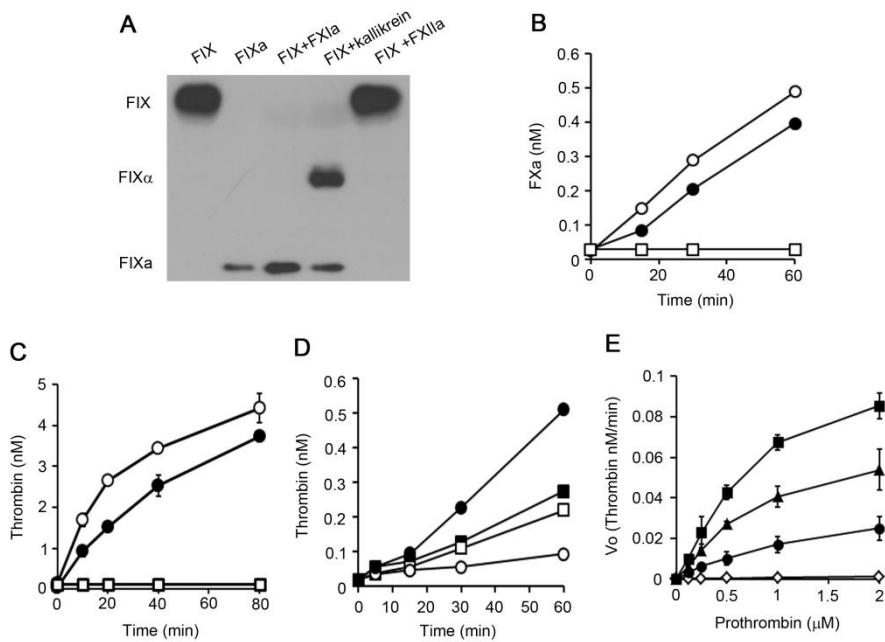

**Figure S4. FXII autoactivation and FXI activation by FXIIa in the presence of dextran sulfate or long polyP.**

(A) Activation of purified FXII (200 nM) was analyzed in the presence of vehicle ( $\diamond$ ), dextran sulfate ( $\bullet$ ; 2  $\mu\text{g/ml}$ ) or long polyP ( $\blacktriangle$ ; 10  $\mu\text{M}$ ). Data are mean  $\pm$  SE (n = 3). (B) FXI activation following addition of 30 nM FXI and 5 nM FXIIa in the presence of vehicle ( $\diamond$ ), 10  $\mu\text{M}$  long polyP ( $\blacktriangle$ ) or 2  $\mu\text{g/ml}$  dextran sulfate ( $\bullet$ ). (C) FXI activation following addition of 30 nM FXI, 200 nM FXII, 50 nM PK and 50 nM HK in the presence of vehicle ( $\diamond$ ), 10  $\mu\text{M}$  long polyP ( $\blacktriangle$ ) or 2  $\mu\text{g/ml}$  dextran sulfate ( $\bullet$ ). FXIa generation was measure with a chromogenic substrate. Data are mean  $\pm$  SE (n = 3).

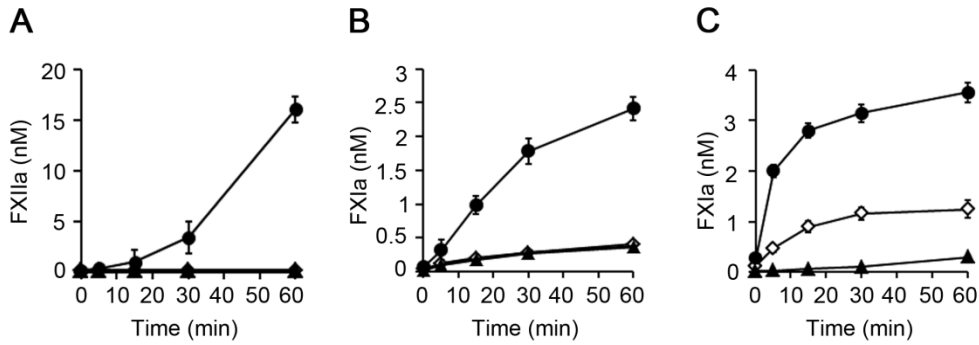

Supplement: NIHMS481651-supplement-Supp_Fig_S1-S4.pdf [file NIHMS481651-supplement-Supp_Fig_S1-S4.pdf]
